# Supplementary material for: Synthesis, Characterization, and Biodistribution of Quantum Dot-Celecoxib Conjugate in Mouse Paw Edema Model
Source: PubMed Central journal article supplement (PMC6038454; doi:10.1155/2018/3090517), 2018-03-22
Supplement: 3090517.f1.pdf [file 3090517.f1.pdf]

Supplementary Material:

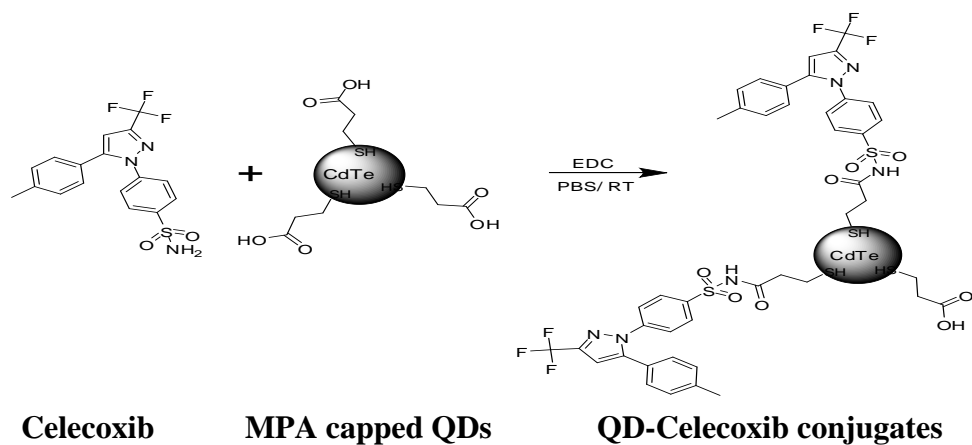

**Scheem.1.** Celecoxib conjugation with the MPA capped CdTe QDs

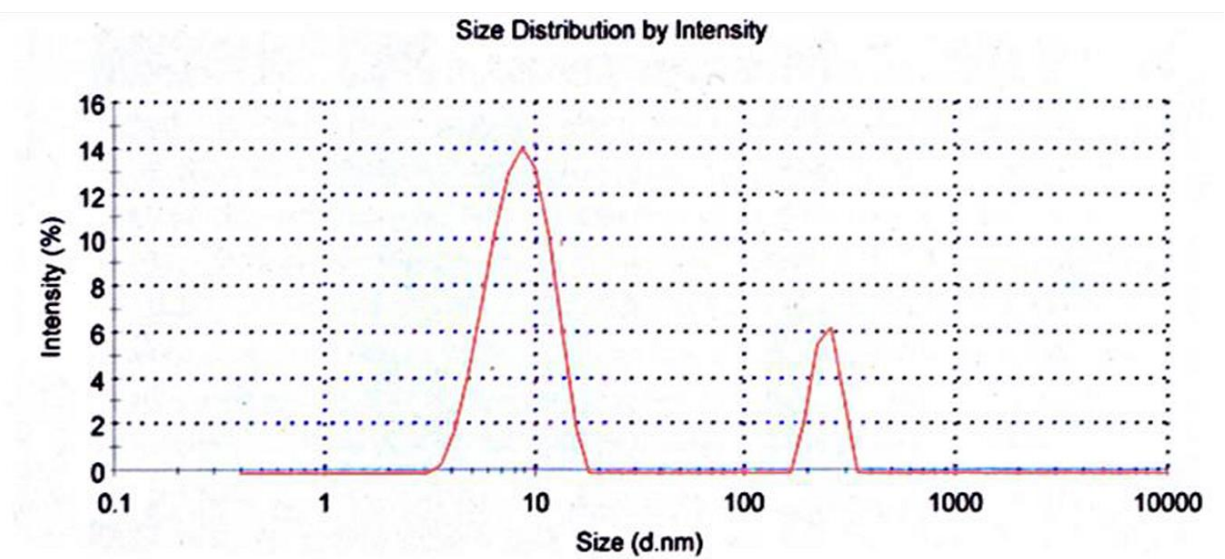

MPA capped CdTe QDs (1mg/ml in PBS at pH 7.4) size distribution by Zetasizer showing major peak at ~8 nm with high intensity and also a small pool of particles showing above 100nm.

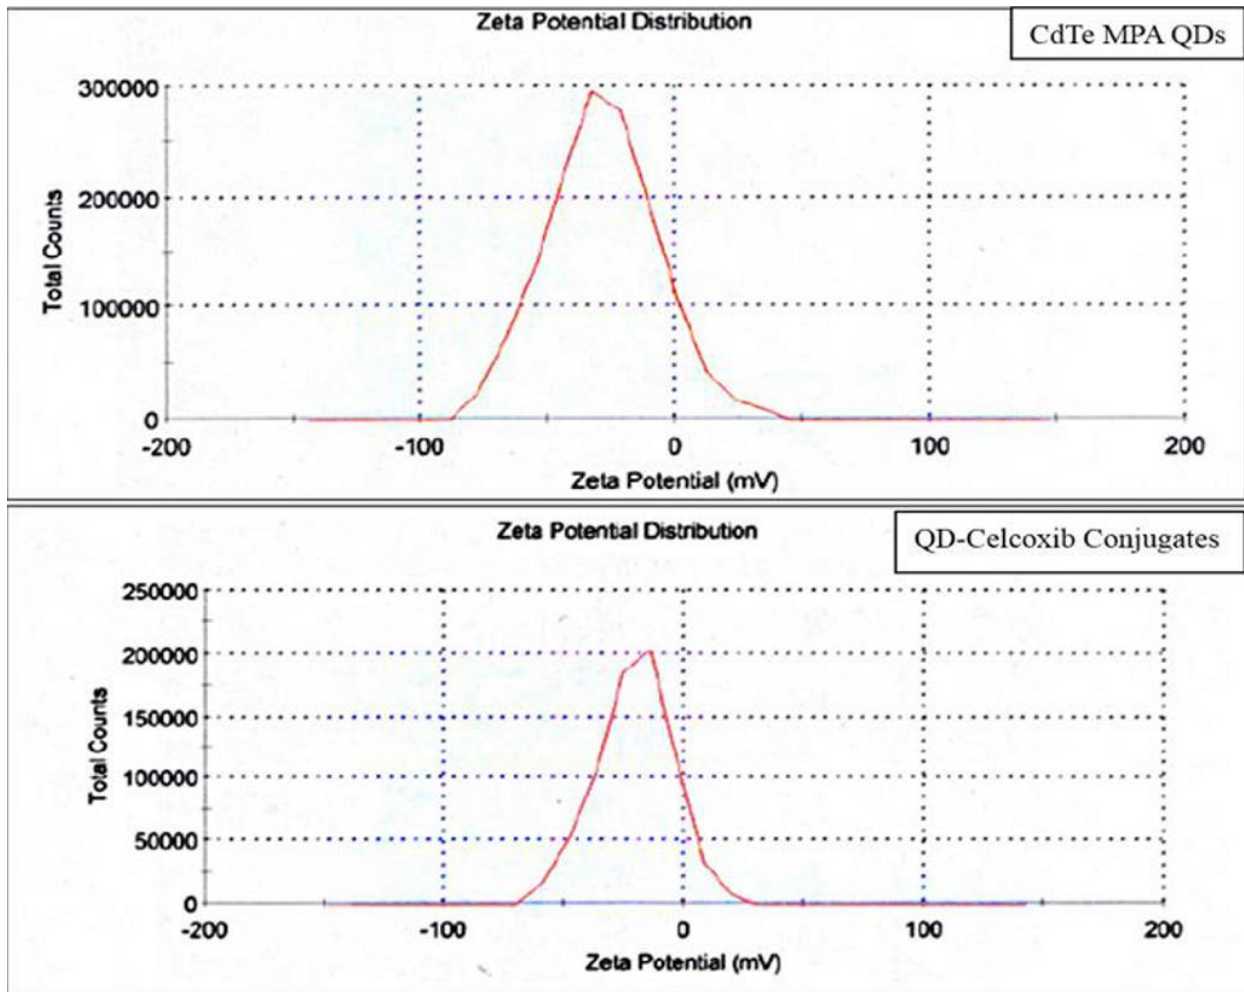

Zeta potential studies for un-conjugated and Celecoxib conjugated QDs showing - 20.4 mV for QD-Celecoxib conjugates - 28.5 mV for MPA capped QDs
